# Supplementary material
Source: PubMed Central journal article supplement (PMC9178499)
Supplement: jamacardiol-e221437-s001.pdf [file jamacardiol-e221437-s001.pdf]

## Supplemental Online Content

Goldstein DJ, Puskas JD, Alexander JH, et al. External support for saphenous vein grafts in coronary artery bypass surgery: a randomized clinical trial. *JAMA Cardiol*. Published online June 8, 2022. doi:10.1001/jamacardio.2022.1437

**eTable 1.** Angiography results

**eTable 2.** IVUS results

**eFigure.** Within-patient differences in IH area

**eTable 3.** Secondary endpoints

**eMethods.** Sensitivity analysis of primary endpoints

**eTable 4.** Different analysis populations and missing data assumption

**eTable 5.** Varying penalty for occluded/severely diseased grafts in primary endpoint

### **Patient- and vessel-level factors for occluded/severely diseased grafts:**

**eTable 6.** Characteristics of patients with occluded/severely diseased graft(s)

**eTable 7.** Characteristics of occluded/severely diseased grafts by randomization arm

This supplemental material has been provided by the authors to give readers additional information about their work.

**eTable 1. Angiography Results**

|                             | Patients with at least one SVG | Device Supported | Device Unsupported |
|-----------------------------|--------------------------------|------------------|--------------------|
| <b>Vein Graft Occlusion</b> | 85/203 (41.9%)                 | 55/203 (27.1%)   | 56/203 (27.6%)     |
| <b>100% Occlusion</b>       | 74/203 (36.5%)                 | 47/203 (23.2%)   | 45/203 (22.2%)     |
| <b>Severe Disease</b>       | 18/203 (8.9%)                  | 8/203 (3.9%)     | 11/203 (5.4%)      |
| <b>Vein Graft Failure</b>   | 87/202 (43.1%)                 | 61/202 (30.2%)   | 53/202 (26.2%)     |

Abbreviations: SVG, saphenous vein grafts

**eTable 2. IVUS Results**

|                             | Device Supported (N=203) | Device Unsupported (N=203) | Missing value imputation |
|-----------------------------|--------------------------|----------------------------|--------------------------|
| <b>IVUS performed</b>       | 143 (70.4%)              | 142 (70.0%)                | None                     |
| <b>100% Graft Occlusion</b> | 47 (23.2%)               | 45 (22.2%)                 | Not missing at random    |
| <b>Graft Severe Disease</b> | 8 (3.9%)                 | 11 (5.4%)                  | Not missing at random    |
| <b>Technical Issues</b>     | 5 (2.5%)                 | 5 (2.5%)                   | Missing at random        |

Abbreviations: IVUS, intravascular ultrasound

**eFigure. Within-Patient Differences in IH Area**

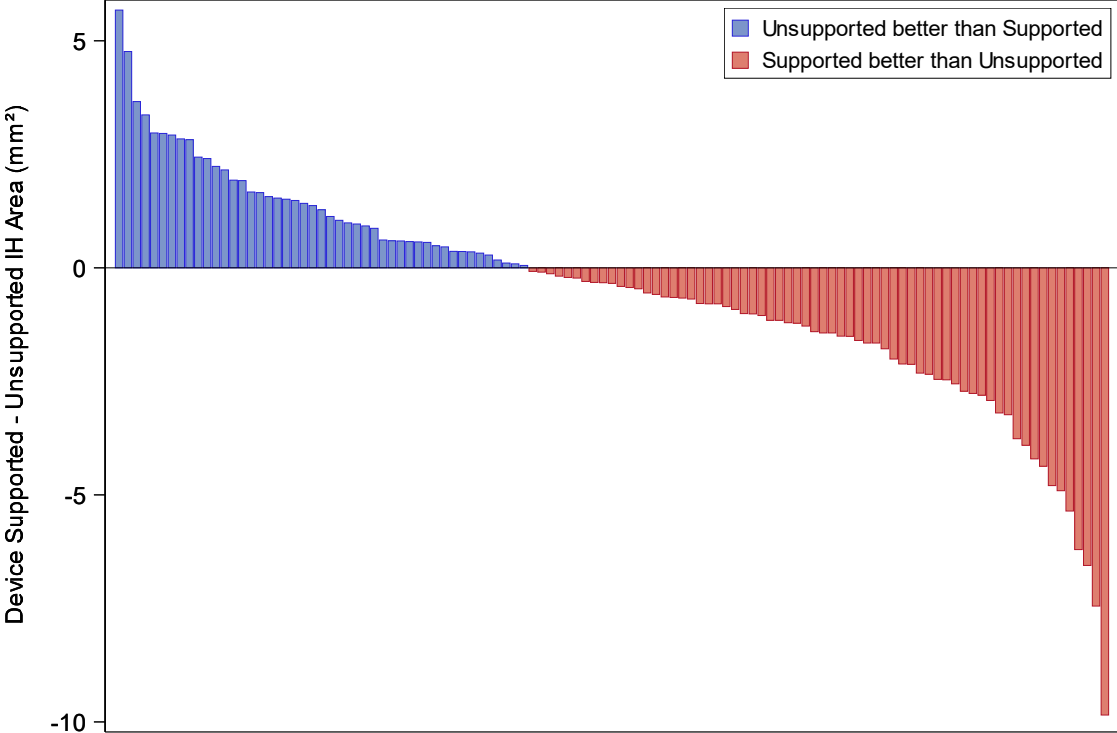

Waterfall plot of the differences in intimal hyperplasia (IH) area between device supported and unsupported grafts within each of 113 patients for which both graft were evaluable with IVUS at 12 months post-randomization. A positive difference indicates higher IH area in supported graft compared to unsupported graft. A negative difference indicates higher IH area in unsupported graft compared to supported graft.

**eTable 3. Secondary Endpoints**

| Secondary Outcomes                                               | Analysis Population           | Device Supported | Device Unsupported | Mixed Model <sup>a</sup> Difference (95% CI) |
|------------------------------------------------------------------|-------------------------------|------------------|--------------------|----------------------------------------------|
| Intimal Hyperplasia Thickness, mean (SD), mm                     | All Available (n=285 vessels) | 0.38 (0.14)      | 0.43 (0.16)        | -.044 (-.075, -.013)                         |
| Lumen Diameter Uniformity by CV, mean (SD)                       | All Available (n=307 vessels) | 0.13 (0.06)      | 0.13 (0.07)        | 0.001 (-.011, 0.014)                         |
| Ratio SVG Lumen Diam. to Target Artery Lumen Diam., mean (SD)    | All Available (n=305 vessels) | 1.64 (0.37)      | 1.62 (0.37)        | 0.015 (-.057, 0.088)                         |
| Blood Flow, mean (SD), mL/s                                      | All Available (n=297 vessels) | 1.05 (0.63)      | 1.00 (0.58)        | 0.064 (-.067, 0.196)                         |
| Blood Velocity, mean (SD), cm/s                                  | All Available (n=297 vessels) | 15.15 (7.19)     | 14.74 (6.63)       | 0.561 (-.844, 1.966)                         |
| TIMI Flow Grade, No. (%)                                         | Completer (n=199 patients)    |                  |                    |                                              |
| 0                                                                |                               | 46 (23.1)        | 42 (21.1)          |                                              |
| 1                                                                |                               | 0 (0)            | 1 (0.5)            |                                              |
| 2                                                                |                               | 14 (7.0)         | 9 (4.5)            |                                              |
| 3                                                                |                               | 139 (69.8)       | 147 (73.9)         |                                              |
| Ectasia, No. (%)                                                 | Completer (n=126 patients)    | 21 (16.7)        | 27 (21.4)          |                                              |
| Graft Failure (Supported on left, Unsupported on right), No. (%) | Completer (n=99 patients)     | 30 (30.3)        | 32 (32.3)          |                                              |
| Graft Failure (Supported on right, Unsupported on left), No. (%) | Completer (n=91 patients)     | 28 (30.8)        | 18 (19.8)          |                                              |

Abbreviations: CV, coefficient of variation; Diam., diameter; SVG, saphenous vein grafts; TIMI, Thrombolysis in Myocardial Infarction

<sup>a</sup> Point and interval estimates based on linear mixed effects model with random subject effect and device supported vs. unsupported as fixed effect.

## eMethods. Sensitivity Analyses of the Primary Endpoint

The Statistical Analysis Plan (SAP) included sensitivity analyses of the primary endpoint. One of them was evaluating the primary endpoint in different analysis populations. We considered the completer analysis set and intent-to-treat analysis set, and per-protocol analysis set.

A complete case analysis was performed on the primary endpoint and included all vessels of patients with non-missing 12-month intimal hyperplasia area for both the supported and unsupported grafts (n=113 patients; 226 vessels). The analysis employed the standard Wilcoxon signed-rank test and assumed that unmeasured intimal hyperplasia area was missing completely at random.

An intent-to-treat analysis was performed on the primary endpoint and included all randomized vessels (n=224 patients; 448 vessels). Missing values of vessels for patients who refused the 12-month visit or who were lost to follow-up (including withdrawals) prior to the 12-month assessment were considered missing at random. Missing values of vessels for patients who died prior to the 12-month assessment were considered as equivalent for the supported and unsupported vessel and received a 0 in the computation of the test statistic for the Wilcoxon signed-rank test. Missingness due to occlusion/severe disease or technical issues were handled similarly as in the primary analysis in which technical issues was assumed missing at random while occlusion/severe disease was considered not missing at random with occluded/severely diseased vessels penalized with higher imputed values. The analysis employed a modified form of the Wilcoxon signed-rank test, similar to the analysis of the primary endpoint.

Another sensitivity analysis performed on the primary endpoint in the full analysis set (n=203 patients; 406 vessels) was to assume that missing intimal hyperplasia area due to occlusion/severe disease was missing at random. This implied that imputed values for occluded/severely diseased vessels were not shifted higher and were not penalized in the calculation of the test statistic for the Wilcoxon signed-rank test. Therefore, the analysis employed the standard Wilcoxon signed-rank test.

Lastly, a per protocol analysis was performed on the primary endpoint. The per protocol set was a subset of the full analysis set with the additional following exclusions: (1) patients whose 12-month primary endpoint visit was not completed within  $\pm 90$  days of the expected date (2) patients with missing TTFM flow data during the index procedure (3) patients who did not have the study device implanted and (4) patients with a deviation of “Investigational Device not used per Instructions for Use” (n=191 patients; 382 vessels). Missing intimal hyperplasia area was handled similarly as the primary analysis and the modified form of the Wilcoxon signed-rank test was used.

**Table 4. Different analysis populations and missing data assumption for primary endpoint**

| Analysis Set                                   | Missing Assumption<br>Occluded/Diseased<br>Grafts | No.<br>Patients | Device<br>Supported | Device<br>Unsupported | P Value |
|------------------------------------------------|---------------------------------------------------|-----------------|---------------------|-----------------------|---------|
| Full Analysis Set<br>Estimated mean $\pm$ SE   | Not missing at random<br>(Primary Analysis)       | 203             | 5.11 $\pm$ 0.16     | 5.79 $\pm$ 0.20       | 0.07    |
| Completer Set<br>Observed mean $\pm$ SE        | Completely at random                              | 113             | 4.58 $\pm$ 0.18     | 5.12 $\pm$ 0.23       | 0.04    |
| Intent-to-Treat Set<br>Estimated mean $\pm$ SE | Not missing at random                             | 224             | 5.08 $\pm$ 0.17     | 5.69 $\pm$ 0.19       | 0.08    |
| Full Analysis Set<br>Estimated mean $\pm$ SE   | Missing at random                                 | 203             | 4.64 $\pm$ 0.15     | 5.32 $\pm$ 0.19       | 0.006   |
| Per Protocol Set<br>Estimated mean $\pm$ SE    | Not missing at random                             | 191             | 5.07 $\pm$ 0.18     | 5.66 $\pm$ 0.19       | 0.06    |

Abbreviations: SE, standard error

In the analysis of the primary endpoint, we assumed that the mean for non-observed values due to occlusion/severe disease was shifted higher than the mean for observed values (not missing at random assumption) and equal to the 90<sup>th</sup> percentile of the distribution of intimal hyperplasia area. The value of the shift parameter, 1.70, was based on previous studies and values drawn from a normal distribution with mean=1.70 and standard deviation=0.25 were added to the imputed values of occluded/severely diseased grafts. Data from the current trial showed that the value of the shift parameter was closer to the 83.5<sup>th</sup> percentile rather than the 90<sup>th</sup> percentile.

We varied the shift parameter to correspond to different percentiles of intimal hyperplasia area to determine how large the shift had to be to change the outcome of the primary analysis with respect to statistical significance of the treatment effect in the full analysis set (n=203 patients; 406 vessels). We did not go below the 65<sup>th</sup> percentile since the shift parameter would be smaller than the assumed standard deviation of 0.25 (or because the percentile was smaller than the aggregate mean).

**eTable 5. Varying penalty for occluded/severely diseased grafts in primary endpoint**

| Percentile of IH Area         | Shift | P Value |
|-------------------------------|-------|---------|
| 65 <sup>th</sup> percentile   | 0.50  | 0.093   |
| 70 <sup>th</sup> percentile   | 0.69  | 0.087   |
| 75 <sup>th</sup> percentile   | 0.95  | 0.085   |
| 83.5 <sup>th</sup> percentile | 1.70  | 0.072   |
| 85 <sup>th</sup> percentile   | 1.93  | 0.074   |
| 90 <sup>th</sup> percentile   | 2.80  | 0.072   |
| 95 <sup>th</sup> percentile   | 4.10  | 0.087   |

Abbreviations: IH, intimal hyperplasia

The p-values follow a U shape trajectory because our modified Wilcoxon signed-rank test changed the sign of the ranks of the paired differences in favor of the non-occluded graft. Consider the following scenario. That observed intimal hyperplasia area appeared higher in the unsupported grafts than supported grafts and small shifts penalized occluded/diseased grafts less, if the supported graft were occluded/diseased, its imputed intimal hyperplasia area after accounting for not missing at random under a small shift may not be larger than the observed intimal hyperplasia area from its unsupported counterpart. This would be compensated by switching the sign of the difference in favor of the non-occluded/non-diseased unsupported graft in the modified Wilcoxon signed-rank test, yielding a conservative p-value.

## **Patient- and vessel-level factors for occluded/severely diseased grafts**

**eTable 6. Characteristics of patients with occluded/severely diseased graft(s)**

|                                     | <b>Total<br/>(N=85)</b> |
|-------------------------------------|-------------------------|
| Current smoker or ex-smoker         | 39 (45.9)               |
| Diabetes                            | 49 (57.6)               |
| Hypertension                        | 70 (82.4)               |
| Hyperlipidemia                      | 71 (83.5)               |
| SVG harvesting technique, No. (%)   |                         |
| Direct                              | 9 (10.6)                |
| Endoscopic                          | 69 (81.2)               |
| Bridge                              | 7 (8.2)                 |
| Vein preservation, No. (%)          |                         |
| Saline/Heparinized saline           | 50 (58.8)               |
| pH-buffered/Heparinized pH-buffered | 21 (24.7)               |
| Autologous blood                    | 3 (3.5)                 |
| More than one method                | 11 (12.9)               |

Abbreviations: SVG, saphenous vein grafts

**eTable 7. Characteristics of occluded/severely diseased grafts by randomization arm**

|                                            | <b>Device Supported<br/>(N=55)</b> | <b>Device Unsupported<br/>(N=56)</b> |
|--------------------------------------------|------------------------------------|--------------------------------------|
| Native artery % stenosis, No. (%)          |                                    |                                      |
| 50%-74% stenosis                           | 1 (1.8)                            | 0 (0.0)                              |
| 75%-99% occlusion                          | 44 (80.0)                          | 46 (82.1)                            |
| 100% occlusion                             | 10 (18.2)                          | 10 (17.9)                            |
| Graft length, median (IQR), cm             | 14.0 (12.0-15.0)                   | 15.0 (13.0-18.0)                     |
| Final TTFM flow, median (IQR), mL/min      | 32.0 (26.0-45.0)                   | 28.0 (20.0-50.0)                     |
| Final TTFM pulsatility index, median (IQR) | 2.5 (1.9-3.6)                      | 3.4 (2.1-5.0)                        |
| Coronary territory, No. (%)                |                                    |                                      |
| Left                                       | 31 (56.4)                          | 21 (37.5)                            |
| Right                                      | 24 (43.6)                          | 35 (62.5)                            |

Abbreviations: TTFM, transit time flow measurement
