# Supplementary material
Source: PubMed Central journal article supplement (PMC9178499)
Supplement: jamacardiol-e221437-s004.pdf [file jamacardiol-e221437-s004.pdf]

## Data Sharing Statement

### Data

**Data available:** Yes

**Data types:** Deidentified participant data, Data dictionary

**How to access data:** These data will be under control of the sponsor and the data coordinating center, who can be reached via the PI: Annetine C. Gelijns, [annetine.gelijns@mountsinai.org](mailto:annetine.gelijns@mountsinai.org)

**When available:** beginning date: 02-28-2025

### Supporting Documents

**Document types:** None

### Additional Information

**Who can access the data:** Qualified external researchers can request de-identified participant data to conduct research.

**Types of analyses:** Any Purpose

**Mechanisms of data availability:** Proposals will be reviewed and approved by the sponsor and the trial Steering Committee. After approval of a proposal, data can be shared through a secure online platform after signing a data access agreement

**Any additional restrictions:** These de-identified data will only be available for request after all patient follow-up is completed and a period of 12 months has elapsed after U.S. Food and Drug Administration approval.
